# Supplementary material
Source: PubMed Central journal article supplement (PMC6867319)
Supplement: ehp-127-107007-s002.pdf [file ehp-127-107007-s002.pdf]

**Note to readers with disabilities:** *EHP* strives to ensure that all journal content is accessible to all readers. However, some figures and Supplemental Material published in *EHP* articles may not conform to [508 standards](#) due to the complexity of the information being presented. If you need assistance accessing journal content, please contact [ehp508@niehs.nih.gov](mailto:ehp508@niehs.nih.gov). Our staff will work with you to assess and meet your accessibility needs within 3 working days.

### **Supplemental Material**

#### **Prenatal Exposure to PM<sub>2.5</sub> and Cardiac Vagal Tone during Infancy: Findings from a Multiethnic Birth Cohort**

Whitney J. Cowell, Kelly J. Brunst, Ashley J. Malin, Brent A. Coull, Chris Gennings, Itai Kloog, Lianna Lipton, Robert O. Wright, Michelle Bosquet Enlow, and Rosalind J. Wright

#### **Table of Contents**

**Table S1.** Mean±SD infant activity levels at each SFP-R episode stratified by infant sex and number of sequences completed.

**Table S2.** Comparison of PRISM study participant characteristics (continuous) stratified by inclusion vs. exclusion from the current analysis and by whether the infant completed only the first vs. both SFP-R sequences.

**Table S3.** Comparison of PRISM study participant characteristics (categorical) stratified by inclusion vs. exclusion from the current analysis and by whether the infant completed only the first vs. both SFP-R sequences. P-values are from chi-square tests of independence.

**Table S4.** Results from sensitivity analyses examining change ( $\beta$ , 95% CI) in RSA<sub>c</sub> at baseline (Play) and between sequential SFP-R episodes ( $\Delta$ RSA<sub>c</sub>) for a 1-unit increase in PM<sub>2.5</sub> ( $\mu\text{g}/\text{m}^3$ ).

**Table S5.** Results from sensitivity analyses examining change ( $\beta$ , 95% CI) in RSA<sub>c</sub> at baseline (Play) and between sequential SFP-R episodes ( $\Delta$ RSA<sub>c</sub>) for a 1-unit increase in prenatal PM<sub>2.5</sub> ( $\mu\text{g}/\text{m}^3$ ) adjusting for postnatal PM<sub>2.5</sub> exposure.

**Table S6.** Adjusted change in RSA<sub>c</sub> between sequential episodes per a 1-unit increase in PM<sub>2.5</sub> ( $\mu\text{g}/\text{m}^3$ ) in models adjusting for laboratory conditions on the day of SFP-R testing.

**Table S7.** Sensitivity analyses examining change in RSA<sub>c</sub> at baseline and between SFP-R episodes for a 1-unit increase in PM<sub>2.5</sub> in models adjusting for maternal LSC-R scores treated as a dichotomous versus continuous variable (n=237).

**Figure S1.** Geometric mean  $RSA_c$  at the baseline (Play) SFP-R episode by quartile of prenatal  $PM_{2.5}$  exposure among 237 infants enrolled in the Boston-based PRISM cohort.

**Figure S2.** Directed Acyclic Graph illustrating implied conditional dependencies between study variables.

**Figure S3.** Schematic outlining selection of the analytic sample from the underlying PRISM cohort.
